# Supplementary material
Source: PubMed Central journal article supplement (PMC9992339)

## Supplementary Material

Neurofilament Light Chain in Cerebrospinal Fluid as a Novel Biomarker in Evaluating Both Clinical Severity and Therapeutic Response in Niemann-Pick Disease, Type C1

Agrewal et al.

**Supplementary Table 1. NIH and Rush Demographics**

|                                                            | <i>NIH Cohort (n = 94)</i> | <i>Rush Cohort (n = 21)</i> | <i>p-value</i> |
|------------------------------------------------------------|----------------------------|-----------------------------|----------------|
| <i>Age in years, Mean ± SD</i>                             | <i>15 ± 14.6</i>           | <i>14.1 ± 15.2</i>          | <i>0.81</i>    |
| <i>Males, n (%)</i>                                        | <i>41 (44)</i>             | <i>14 (67)</i>              | <i>0.09</i>    |
| <i>Duration of neurologic symptoms in years, Mean ± SD</i> | <i>7.2 ± 7.2</i>           | <i>7.0 ± 6.4</i>            | <i>0.92</i>    |
| <i>Total NIH Severity Score, Mean ±SD</i>                  | <i>15 ± 11</i>             | <i>16 ± 11</i>              | <i>0.62</i>    |
| <i>On miglustat, n (%)</i>                                 | <i>43 (46)</i>             | <i>9 (43)</i>               | <i>0.81</i>    |
| <i>On adrabetadex, n (%)</i>                               | <i>3 (3)</i>               | <i>0 (0)</i>                | <i>1.0</i>     |

**Supplementary Figure 1: Correlation between NFL levels and various outcome measurements at baseline visit and last visit.** A. NPC Neurological Severity Score. B. ASIS. C. Five-Domain Score. D. Ambulation. E. Fine Motor. F. Speech. G. Swallowing. H. Cognition. I. Eye Movement. J. Hearing. K. Memory. L. ASHA-NOMS. M. PAS. For completeness of this figure, graphs from figure 2 are duplicated here.

**A**

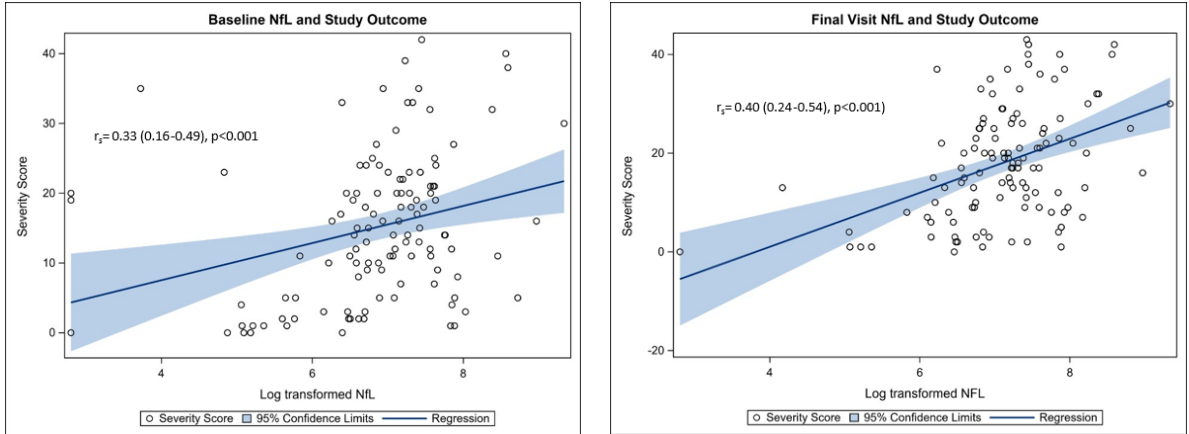

**B**

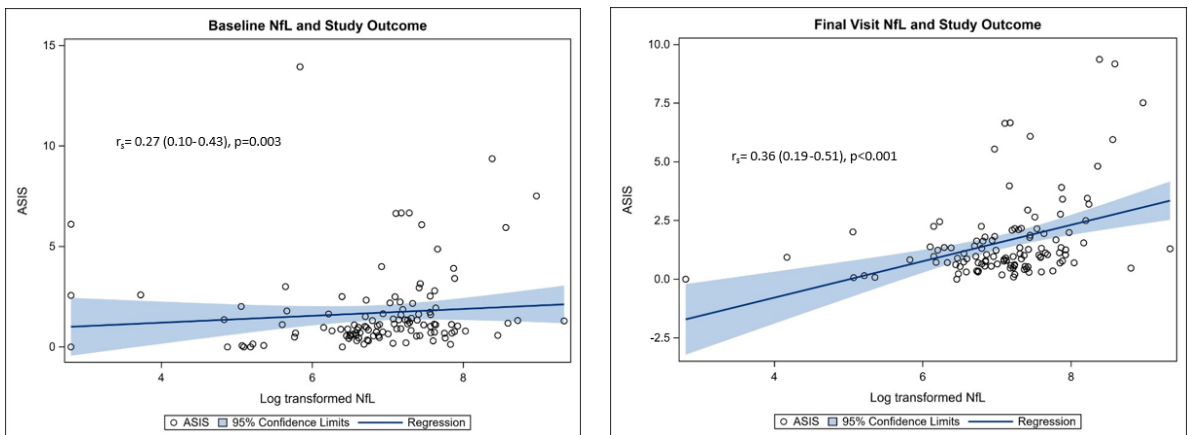

**C**

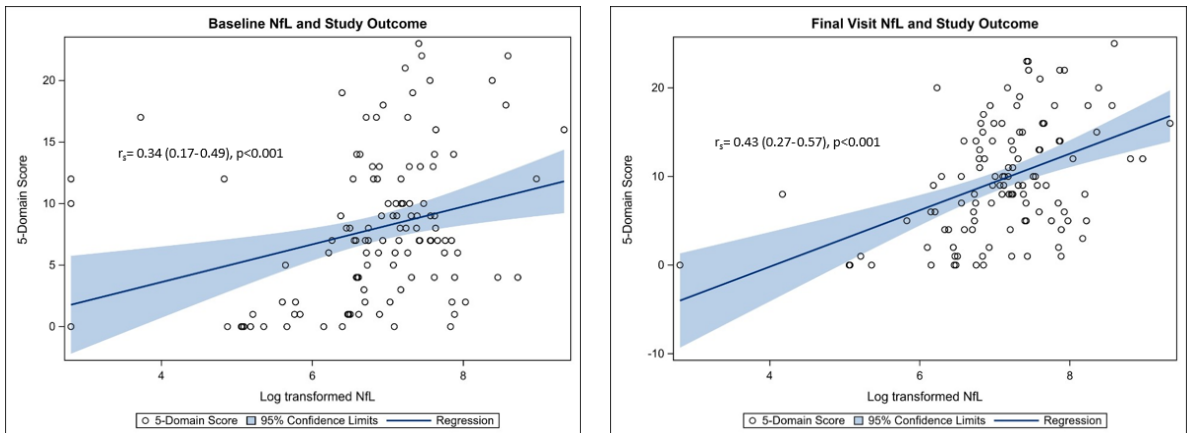

D

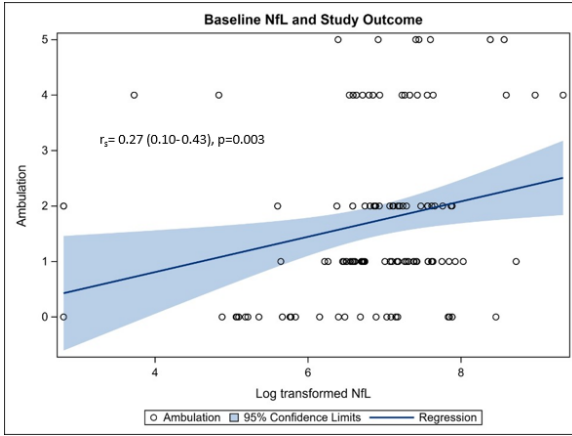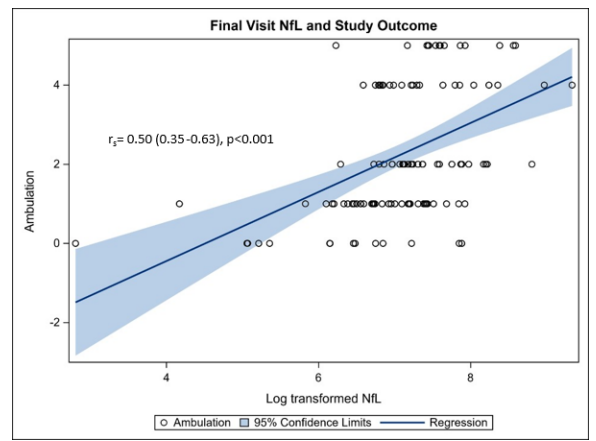

E

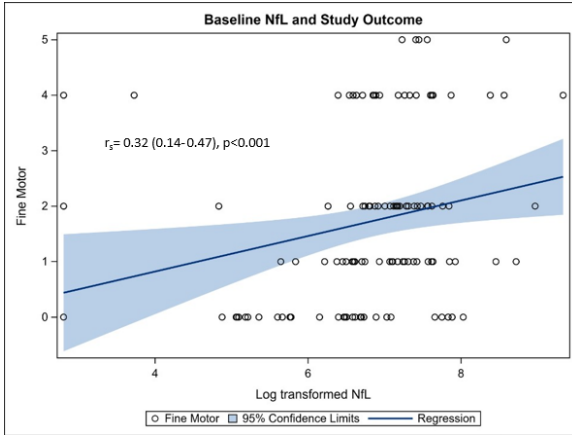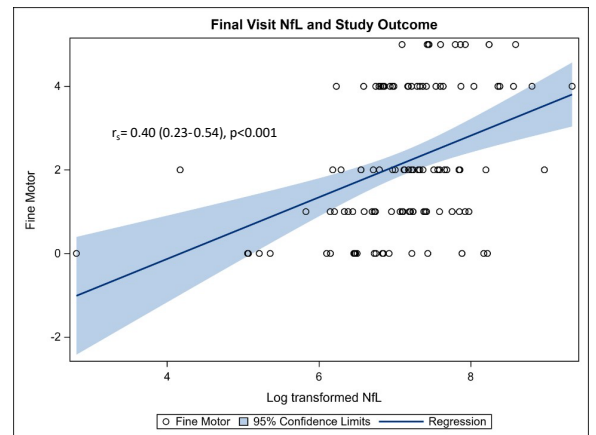

F

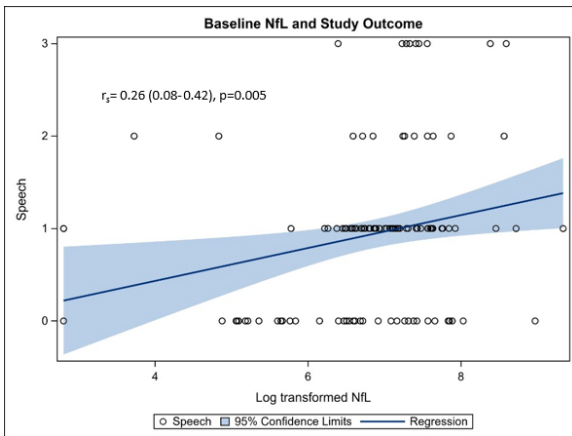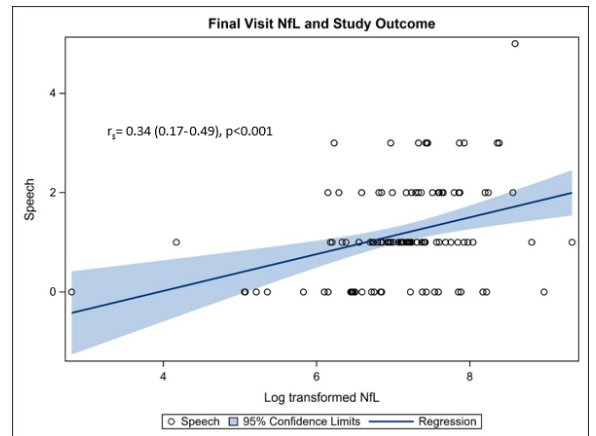

G

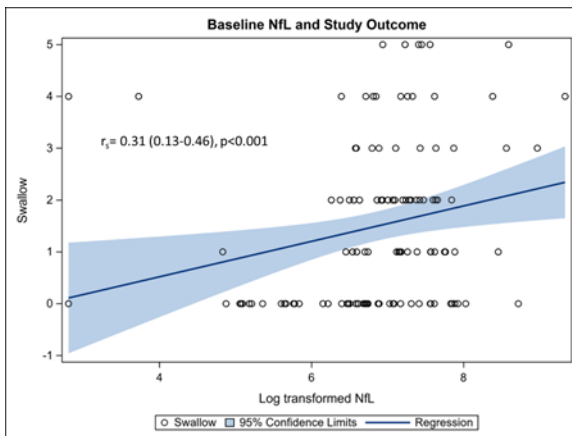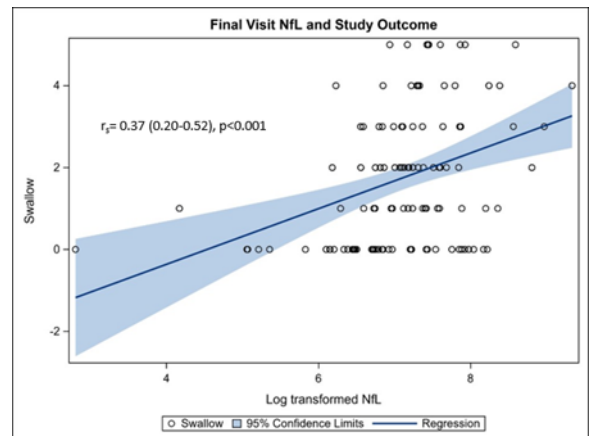

**H**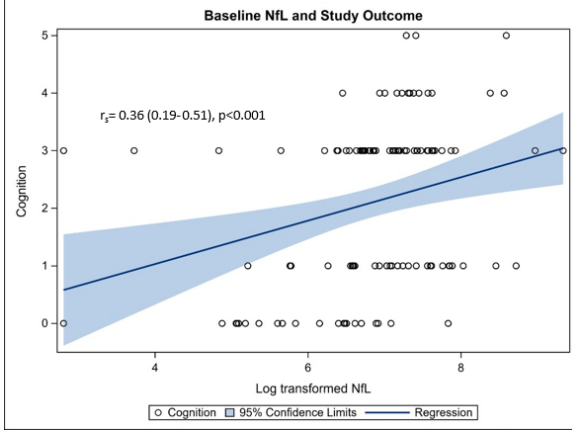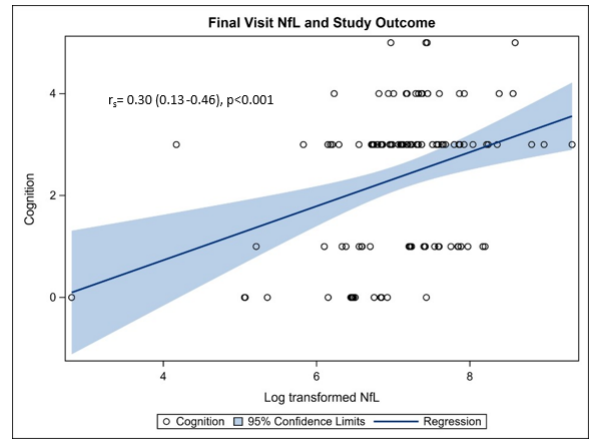**I**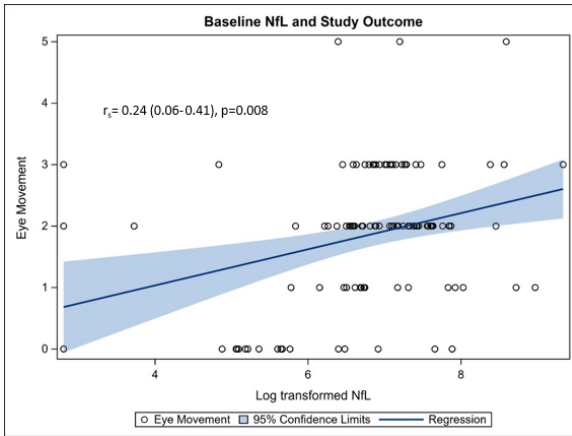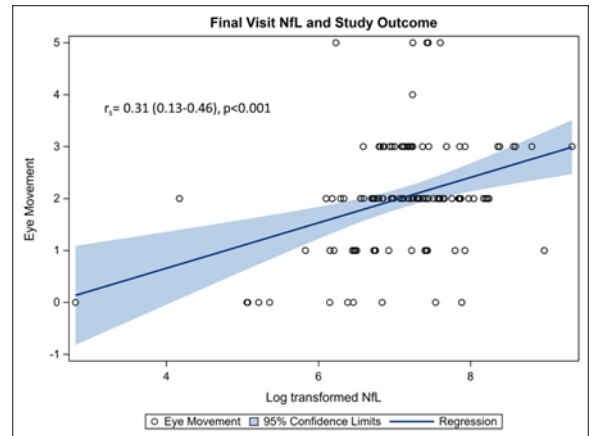**J**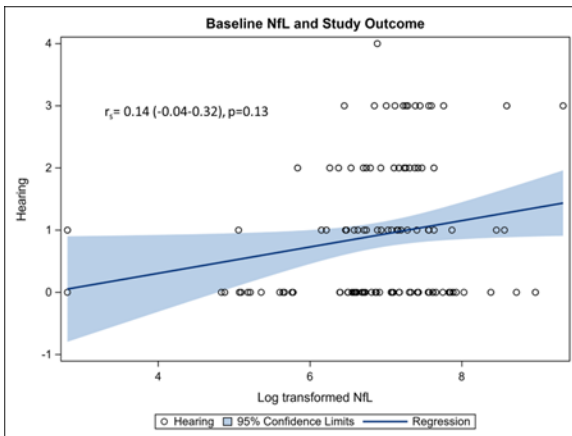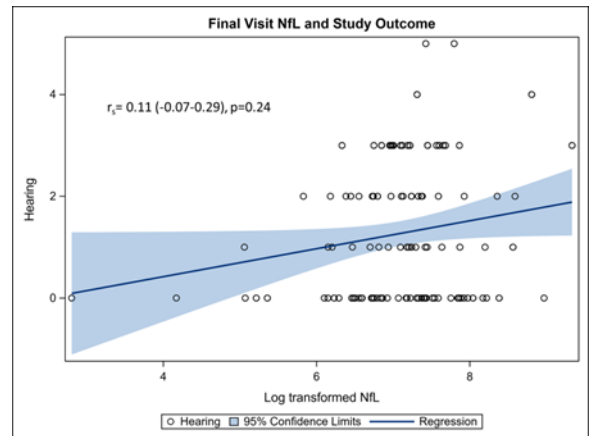**K**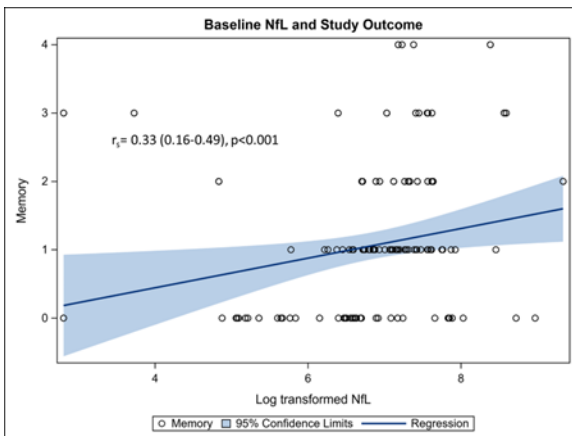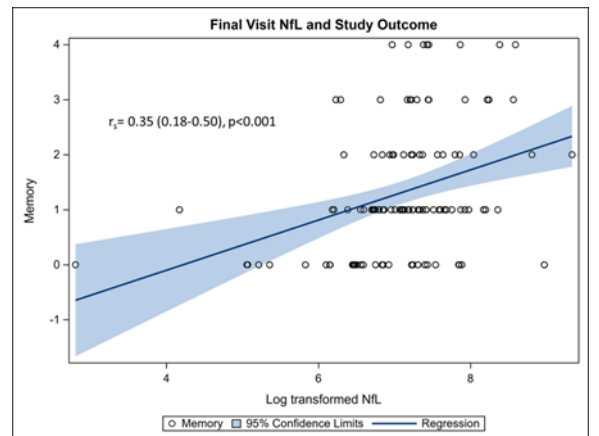

L

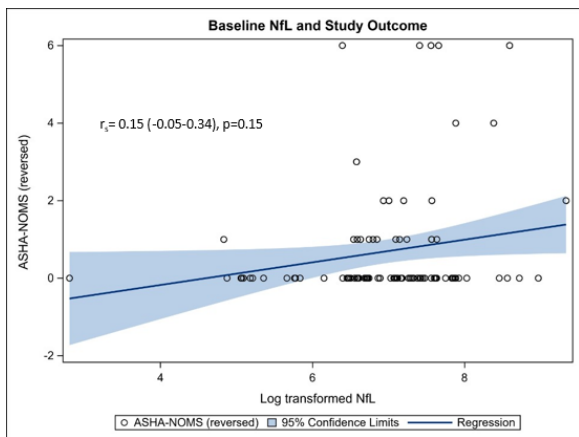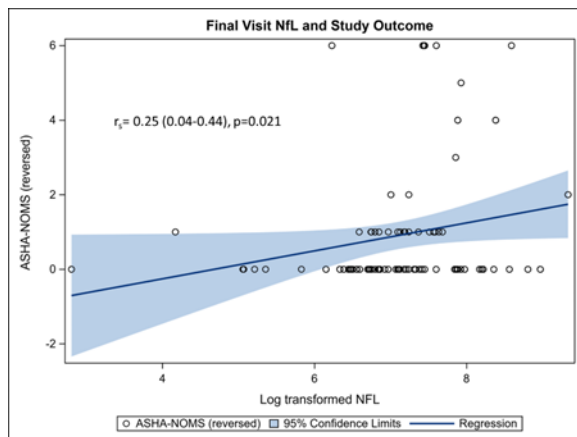

M

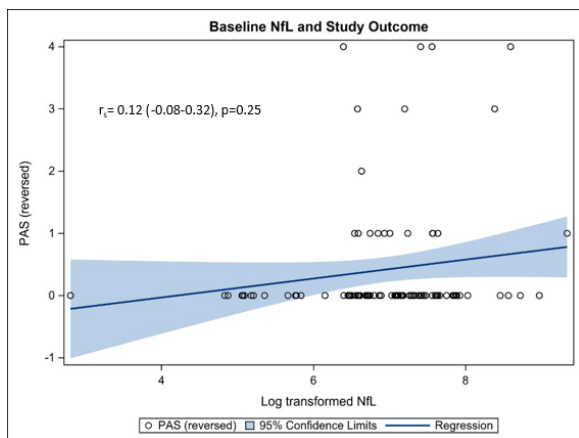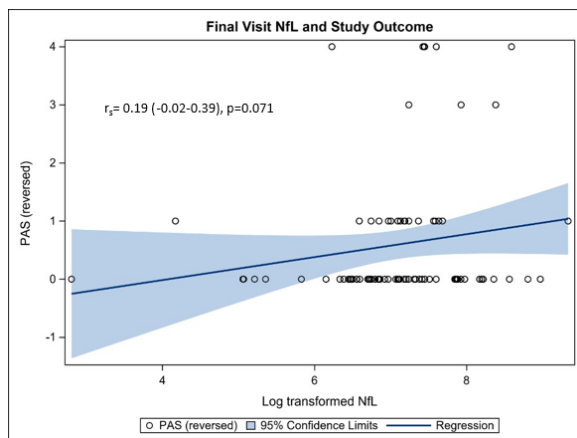

**Supplementary Figure 2: Covariate effects of treatments on various NPC outcome measurements.** Results are from final reduced models of NfL and outcome measurements; where an association was not observed between the covariate and outcome, results from the full model are shown. A: Decreased CSF NfL levels were not observed in individuals being treated with adrabetadex. B: HP $\beta$ CD therapy as a forest plot and table.

A

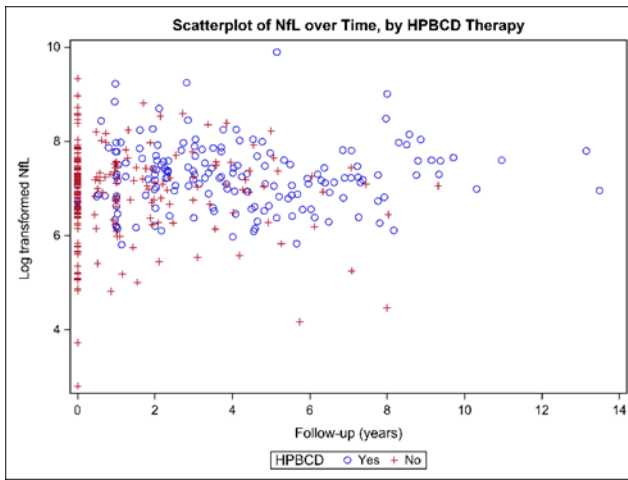

B

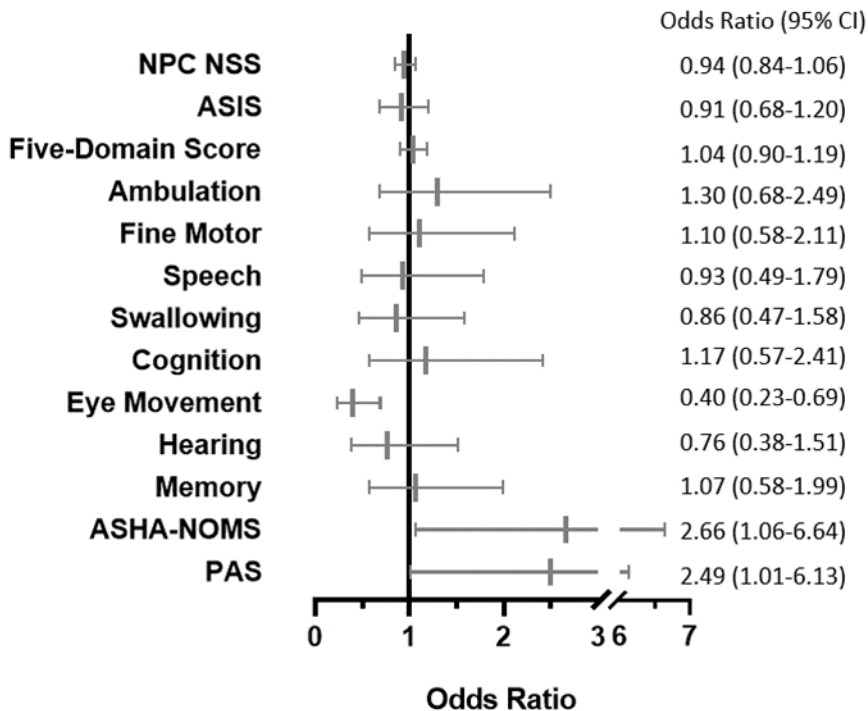

Supplement: NIHMS1872696-supplement-1.pdf [file NIHMS1872696-supplement-1.pdf]
